# Supplementary material
Source: HighWire-hosted journal article supplement (http://jpn.ca/highwire/filestream/89359/field_highwire_adjunct_files/0/jpn-190024-1-at.pdf)
Supplement: jpn-190024-1-at.pdf [file jpn-190024-1-at.pdf]

**Appendix 1** to Huang, X, Bu, X, Yang, C, et al. Quantitative Tractography Reveals Changes in the Corticospinal Tract in Drug-Naïve Children with Attention-Deficit/Hyperactivity Disorder. *J Psychiatry Neurosci* 2019.

DOI: 10.1503/jpn.190024

Copyright © 2019 The Author(s) or their employer(s). To receive this resource in an accessible format, please contact us at [cmajgroup@cmaj.ca](mailto:cmajgroup@cmaj.ca).

*Online appendices are unedited and posted as supplied by the authors.*

| <b>Effect size of group comparison</b> |          |          |                  |                       |
|----------------------------------------|----------|----------|------------------|-----------------------|
| <b>Variable</b>                        | <b>T</b> | <b>p</b> | <b>Cohen's d</b> | <b>effect-size(r)</b> |
| Age                                    | -1.12    | 0.27     | -0.27            | 0.13                  |
| IQ scores                              | -0.43    | 0.67     | -0.10            | 0.05                  |
| <b>Conners' Parent Rating Scale</b>    |          |          |                  |                       |
| Conduct problem                        | 7.03     | <0.001   | 1.80             | 0.67                  |
| Psychosomatic                          | 4.71     | <0.001   | 1.19             | 0.51                  |
| Anxiety                                | 3.23     | 0.002    | 0.80             | 0.37                  |
| Study problem                          | 9.94     | <0.001   | 2.38             | 0.77                  |
| Hyperactivity–impulsivity              | 6.88     | <0.001   | 1.69             | 0.65                  |
| Hyperactivity index                    | 8.93     | <0.001   | 2.13             | 0.73                  |
| <b>Stroop Color-Word Test</b>          |          |          |                  |                       |
| Total time, ms                         | 2.59     | 0.012    | 0.71             | 0.34                  |
| No. right                              | -2.27    | 0.027    | -0.54            | 0.26                  |
| No. errors                             | 1.06     | 0.29     | 0.25             | 0.13                  |
| No. missing                            | 1.39     | 0.17     | 0.33             | 0.16                  |
| <b>Continue Performance Test</b>       |          |          |                  |                       |
| Full scale control quotient            | -1.16    | 0.27     | -0.28            | 0.14                  |
| Visual control quotient                | -1.26    | 0.21     | -0.30            | 0.15                  |
| Auditory control quotient              | -1.09    | 0.28     | -0.26            | 0.13                  |
| Full scale attention quotient          | -4.31    | <0.001   | -1.03            | 0.46                  |
| Visual attention quotient              | -3.85    | <0.001   | -0.92            | 0.42                  |

**Appendix 1** to Huang, X, Bu, X, Yang, C, et al. Quantitative Tractography Reveals Changes in the Corticospinal Tract in Drug-Naïve Children with Attention-Deficit/Hyperactivity Disorder. *J Psychiatry Neurosci* 2019.

DOI: 10.1503/jpn.190024

*Online appendices are unedited and posted as supplied by the authors.*

|                               |       |        |       |      |
|-------------------------------|-------|--------|-------|------|
| Auditory attention quotient   | -4.05 | <0.001 | -0.97 | 0.44 |
| <b>Diffusion Measurement*</b> |       |        |       |      |
| FA_(16-24)                    | 3.46  | <0.001 | 0.83  | 0.38 |
| RD_(16-24)                    | 3.33  | <0.001 | 0.80  | 0.37 |
| MD_(16-24)                    | 1.06  | 0.29   | 0.25  | 0.13 |
| AD_(16-24)                    | 1.06  | 0.29   | 0.25  | 0.13 |
| FA_(83-95)                    | 3.31  | <0.001 | 0.79  | 0.37 |
| RD_(83-95)                    | 2.24  | 0.02   | 0.54  | 0.26 |
| MD_(83-95)                    | 0.54  | 0.59   | 0.13  | 0.06 |
| AD_(83-95)                    | 2.23  | 0.02   | 0.55  | 0.27 |

\* The effect size of diffusion measurements were from the group comparison where the mean value across significant nodes (Node 16-24, Node 83-95) was calculated. This calculation is different from the pointwise comparisons that we performed in our study.

**Appendix 1** to Huang, X, Bu, X, Yang, C, et al. Quantitative Tractography Reveals Changes in the Corticospinal Tract in Drug-Naïve Children with Attention-Deficit/Hyperactivity Disorder. *J Psychiatry Neurosci* 2019.

DOI: 10.1503/jpn.190024

*Online appendices are unedited and posted as supplied by the authors.*

---

---

### Nature Research Editing Service Certification

---

---

This is to certify that the manuscript titled Quantitative Tractography Reveals Uneven Changes of Corticospinal Tract in Drug-Naïve Attention-Deficit /Hyperactivity Disorder Children was edited for English language usage, grammar, spelling and punctuation by one or more native English-speaking editors at Nature Research Editing Service. The editors focused on correcting improper language and rephrasing awkward sentences, using their scientific training to point out passages that were confusing or vague. Every effort has been made to ensure that neither the research content nor the authors' intentions were altered in any way during the editing process.

Documents receiving this certification should be English-ready for publication; however, please note that the author has the ability to accept or reject our suggestions and changes. To verify the final edited version, please visit our verification page. If you have any questions or concerns over this edited document, please contact Nature Research Editing Service at [support@as.springernature.com](mailto:support@as.springernature.com).

**Manuscript title:** Quantitative Tractography Reveals Uneven Changes of Corticospinal Tract in Drug-Naïve Attention-Deficit /Hyperactivity Disorder Children

**Authors:** Xuan Bu, Chuang Yang, Kaili Liang, Qingxia Lin, Lu Lu, Lianqing Zhang, Hailong Li, Yingxue Gao, Shi Tang, Xiaoxiao Hu, Yanlin Wang, Xinyu Hu, Xiaoqi Huang

**Key:** FE98-6496-90B9-AE6C-160P

This certificate may be verified at [secure.authorservices.springernature.com/certificate/verify](https://secure.authorservices.springernature.com/certificate/verify).

Nature Research Editing Service is a service from Springer Nature, one of the world's leading research, educational and professional publishers. We have been a reliable provider of high-quality editing since 2008.

Nature Research Editing Service comprises a network of more than 900 language editors with a range of academic backgrounds. All our language editors are native English speakers and must meet strict selection criteria. We require that each editor has completed or is completing a Masters, Ph.D. or M.D. qualification, is affiliated with a top US university or research institute, and has undergone substantial editing training. To ensure we can meet the needs of researchers in a broad range of fields, we continually recruit editors to represent growing and new disciplines.

Uploaded manuscripts are reviewed by an editor with a relevant academic background. Our senior editors also quality-assess each edited manuscript before it is returned to the author to ensure that our high standards are maintained.
